# Supplementary material
Source: MDPI journal article supplement (https://www.mdpi.com/2073-4352/11/4/330)
Supplement: s1 [file s1]

## Supplementary Materials for

**Stabilization of superionic-conducting high-temperature phase of  $\text{Li}(\text{CB}_9\text{H}_{10})$  via solid solution formation with  $\text{Li}_2(\text{B}_{12}\text{H}_{12})$**

Sangryun Kim<sup>1,★</sup>, Kazuaki Kisu<sup>2</sup>, and Shin-ichi Orimo<sup>1,2,★</sup>

<sup>1</sup>Institute for Materials Research, Tohoku University, 2-1-1 Katahira, Aoba-ku, Sendai 980-8577, Japan

<sup>2</sup>WPI-Advanced Institute for Materials Research (WPI-AIMR), Tohoku University, 2-1-1 Katahira, Aoba-ku, Sendai 980-8577, Japan

★Corresponding authors. E-mail: [sangryun@imr.tohoku.ac.jp](mailto:sangryun@imr.tohoku.ac.jp), [orimo@imr.tohoku.ac.jp](mailto:orimo@imr.tohoku.ac.jp)

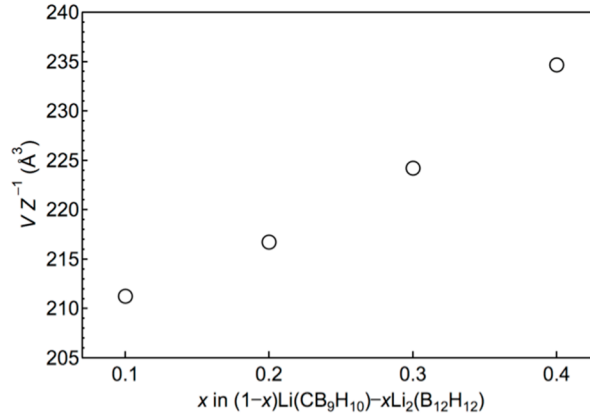

**Figure S1.** Compositional dependence of the lattice volume of the  $(1-x)\text{Li}(\text{CB}_9\text{H}_{10})-x\text{Li}_2(\text{B}_{12}\text{H}_{12})$  compounds with  $0.1 \leq x \leq 0.4$ . The compounds with  $x = 0.1$  and  $0.2$  were indexed to a hexagonal unit cell consistent with that of the low- $T$  phase (space group  $P3c1$ , ( $Z = 6$ )) [3] of  $\text{Li}(\text{CB}_9\text{H}_{10})$  ( $x = 0$ ). The  $x = 0.3$  and  $0.4$  compounds were indexed to a hexagonal unit cell consistent with that of the high- $T$  phase (space group  $P31c$ , ( $Z = 2$ )) [21] of  $\text{Li}(\text{CB}_9\text{H}_{10})$  ( $x = 0$ ).

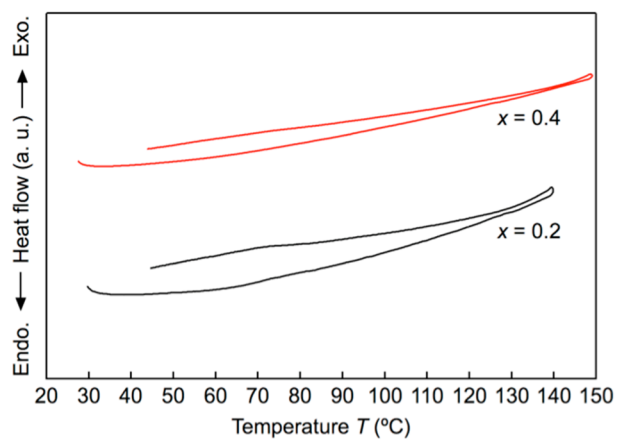

**Figure S2.** Enlarged DTA curves for the  $x = 0.2$  and  $0.4$  compounds in Figure 2.

**Table S1.** Lithium-ion conductivities at 25 °C and activation energies of  $(1-x)\text{Li}(\text{CB}_9\text{H}_{10})-x\text{Li}_2(\text{B}_{12}\text{H}_{12})$  ( $0.1 \leq x \leq 0.5$ ).

| $x$ | Ionic Conductivity<br>( $\text{S cm}^{-1}$ ) | Activation Energy<br>( $\text{kJ mol}^{-1}$ ) |
|-----|----------------------------------------------|-----------------------------------------------|
| 0.1 | $7.5 \times 10^{-4}$                         | –                                             |
| 0.2 | $1.4 \times 10^{-3}$                         | –                                             |
| 0.3 | $1.6 \times 10^{-3}$                         | 40.5                                          |
| 0.4 | $1.7 \times 10^{-3}$                         | 40.3                                          |
| 0.5 | $5.8 \times 10^{-4}$                         | –                                             |

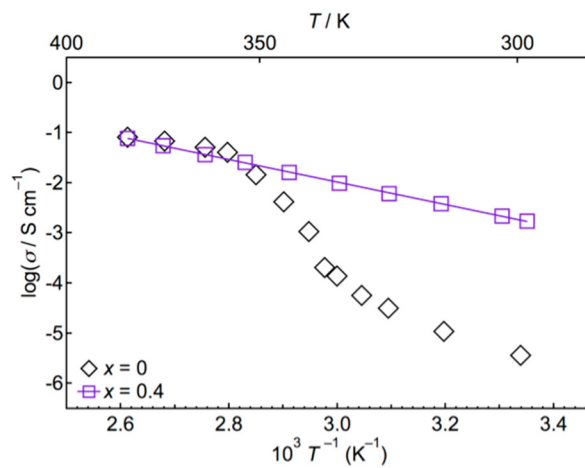

**Figure S3.** Arrhenius plots of the lithium-ion conductivities for the compounds with  $x = 0$  ( $\text{Li}(\text{CB}_9\text{H}_{10})$ ) and  $x = 0.4$  ( $0.6\text{Li}(\text{CB}_9\text{H}_{10})-0.4\text{Li}_2(\text{B}_{12}\text{H}_{12})$ ).

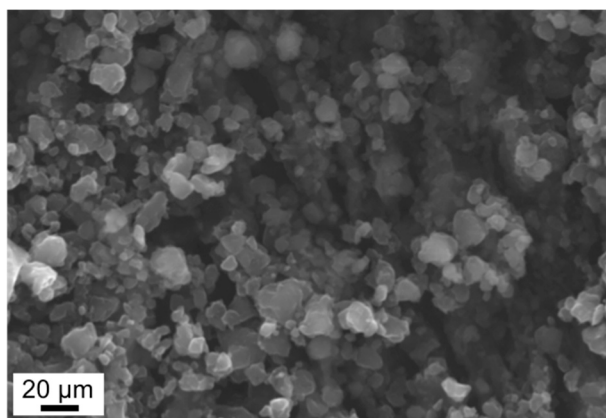

**Figure S4.** SEM micrograph of the  $x = 0.4$  ( $0.6\text{Li}(\text{CB}_9\text{H}_{10})-0.4\text{Li}_2(\text{B}_{12}\text{H}_{12})$ ) compound.

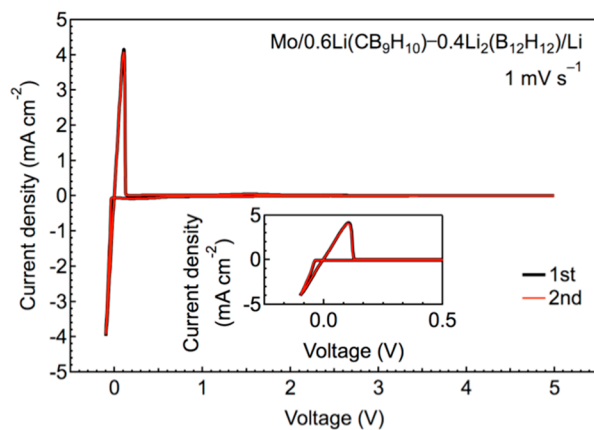

**Figure S5.** Cyclic voltammograms of a Mo/0.6Li(CB<sub>9</sub>H<sub>10</sub>)-0.4Li<sub>2</sub>(B<sub>12</sub>H<sub>12</sub>)/Li cell at a scan rate of 1 mV s<sup>-1</sup> during two cycles. Insets show the magnified plots in the low-voltage region.

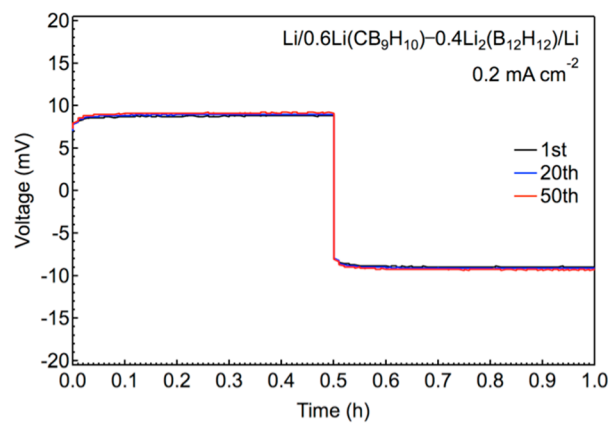

**Figure S6.** Galvanostatic cycling profiles of a Li/0.6Li(CB<sub>9</sub>H<sub>10</sub>)-0.4Li<sub>2</sub>(B<sub>12</sub>H<sub>12</sub>)/Li cell at 0.2 mA cm<sup>-2</sup>.

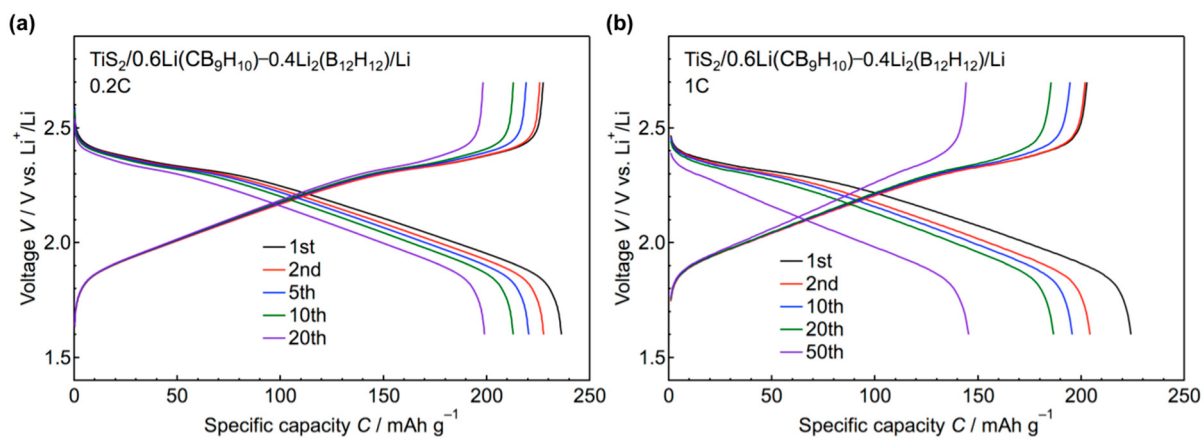

**Figure S7.** Discharge-charge profiles for the  $\text{TiS}_2/0.6\text{Li}(\text{CB}_9\text{H}_{10})-0.4\text{Li}_2(\text{B}_{12}\text{H}_{12})/\text{Li}$  cells for rates of (a) 0.2C and (b) 1C.
